# Supplementary material
Source: publisher figshare collection journal article supplement (https://karger.figshare.com/ndownloader/files/29093088)
Supplement: Supplementary file 1 [file 29093088]

**Supplementary Table 3.** Total of expressed and no expressed unique KO numbers found for all the genes for all groups (CA: caries active subjects: ANCL: active non-cavitated lesion; INCL: inactive non-cavitated lesion; S: sound; CI: caries inactive subjects: INCL: inactive non-cavitated lesion; CF: caries-free subjects: S: sound). (Fonte: MG-RAST).

| **Groups** | **ID unique KO** | |  |
| --- | --- | --- | --- |
| **Expressed** | **No expressed** | **Total** |
| **ANCL-CA** | 1,877 | 590 | 2,467 |
| **INCL-CA** | 1,464 | 1,003 | 2,467 |
| **S-CA** | 2,100 | 367 | 2,467 |
| **INCL-CI** | 1,325 | 1,142 | 2,467 |
| **S-CF** | 1,662 | 805 | 2,467 |
